# Supplementary material
Source: Springer Nature journal article supplement (https://www.springermedizin.de/resource/supplementary/13058_2011_2917_MOESM5_ESM.pdf/9702892)
Supplement: MOESM5 [file 9702892]

**CTC**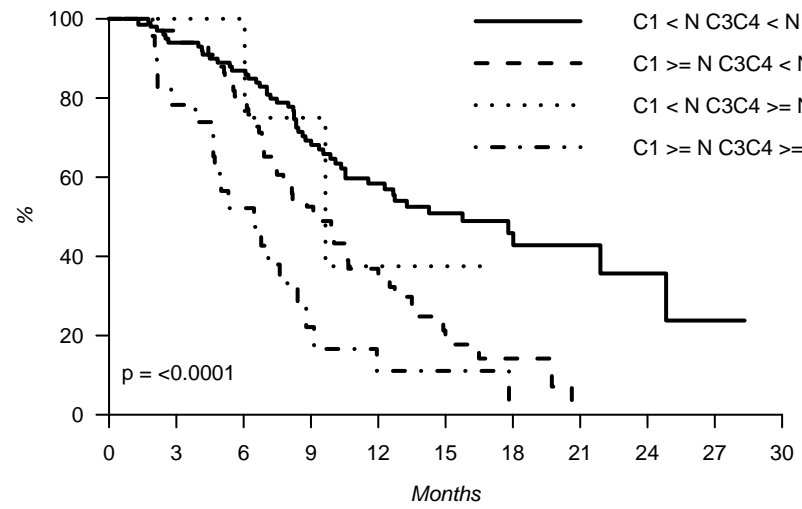**Number at risk**

|      |     |    |    |    |    |    |    |   |   |   |   |
|------|-----|----|----|----|----|----|----|---|---|---|---|
| —    | 102 | 93 | 86 | 63 | 42 | 29 | 15 | 6 | 3 | 1 | 0 |
| - ·  | 67  | 63 | 52 | 30 | 16 | 5  | 3  | 0 | 0 | 0 | 0 |
| ···· | 4   | 4  | 4  | 2  | 1  | 1  | 0  | 0 | 0 | 0 | 0 |
| - ·  | 23  | 18 | 11 | 4  | 2  | 1  | 0  | 0 | 0 | 0 | 0 |

**CEA**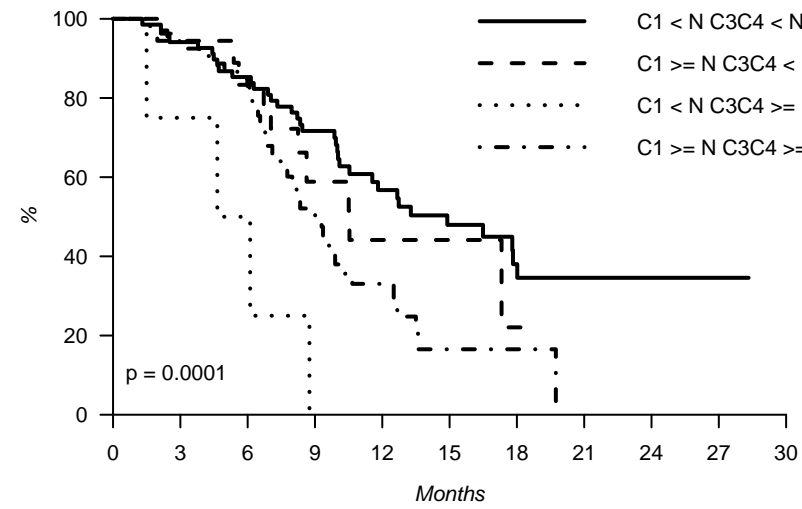**Number at risk**

|      |    |    |    |    |    |    |    |   |   |   |   |
|------|----|----|----|----|----|----|----|---|---|---|---|
| —    | 68 | 64 | 57 | 45 | 27 | 20 | 11 | 3 | 1 | 1 | 0 |
| - ·  | 18 | 17 | 15 | 8  | 4  | 3  | 1  | 0 | 0 | 0 | 0 |
| ···· | 4  | 3  | 2  | 0  | 0  | 0  | 0  | 0 | 0 | 0 | 0 |
| - ·  | 54 | 50 | 44 | 23 | 10 | 3  | 1  | 0 | 0 | 0 | 0 |

**LDH**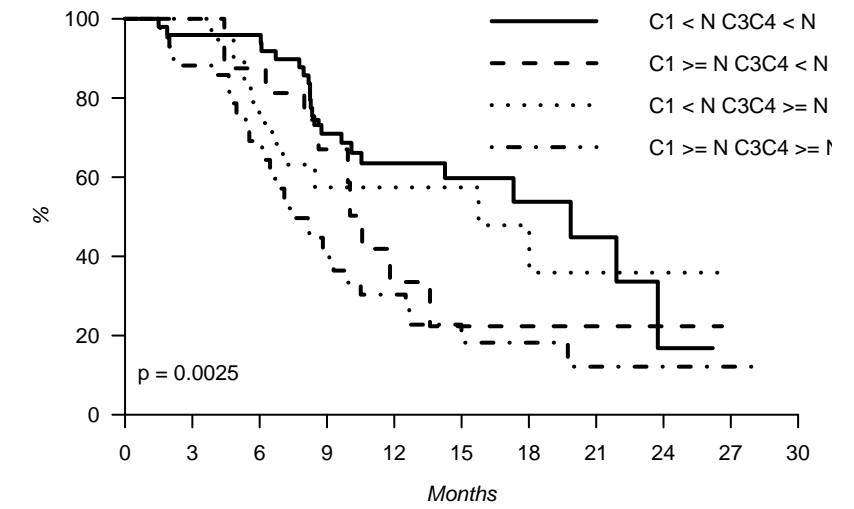**Number at risk**

|      |    |    |    |    |    |    |   |   |   |   |   |
|------|----|----|----|----|----|----|---|---|---|---|---|
| —    | 49 | 47 | 47 | 32 | 19 | 15 | 7 | 4 | 1 | 0 | 0 |
| - ·  | 16 | 16 | 14 | 8  | 4  | 2  | 1 | 1 | 1 | 0 | 0 |
| ···· | 20 | 19 | 14 | 10 | 7  | 6  | 4 | 2 | 1 | 0 | 0 |
| - ·  | 43 | 37 | 29 | 16 | 9  | 4  | 3 | 2 | 2 | 1 | 0 |

**CA15-3**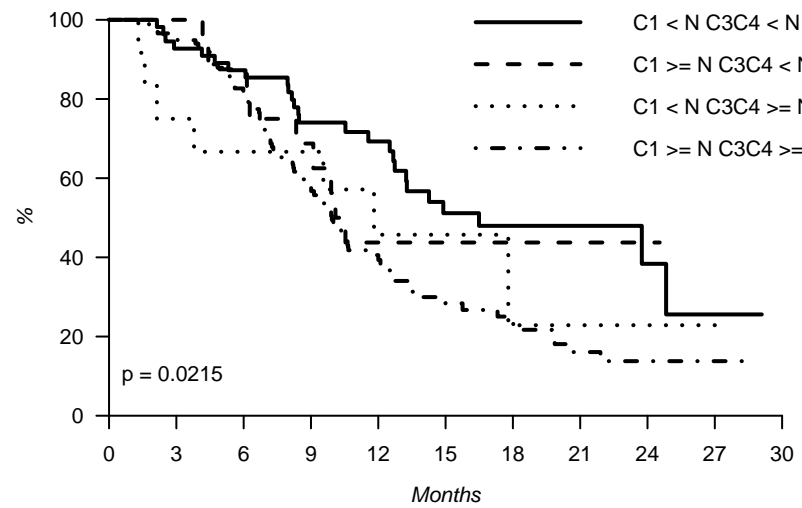**Number at risk**

|      |     |     |    |    |    |    |    |   |   |   |   |
|------|-----|-----|----|----|----|----|----|---|---|---|---|
| —    | 56  | 51  | 47 | 38 | 28 | 18 | 11 | 6 | 4 | 1 | 0 |
| - ·  | 16  | 16  | 14 | 11 | 5  | 5  | 3  | 1 | 1 | 0 | 0 |
| ···· | 12  | 9   | 8  | 7  | 4  | 4  | 1  | 1 | 1 | 1 | 0 |
| - ·  | 117 | 111 | 94 | 57 | 33 | 18 | 14 | 7 | 5 | 2 | 0 |

**CYFRA21-1**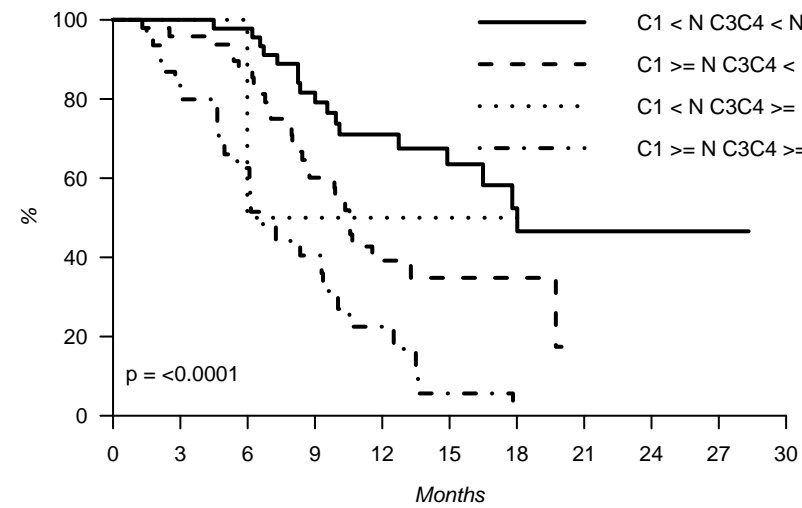**Number at risk**

|      |    |    |    |    |    |    |   |   |   |   |   |
|------|----|----|----|----|----|----|---|---|---|---|---|
| —    | 45 | 45 | 44 | 33 | 21 | 15 | 9 | 3 | 1 | 1 | 0 |
| - ·  | 48 | 46 | 42 | 25 | 10 | 7  | 2 | 0 | 0 | 0 | 0 |
| ···· | 2  | 2  | 1  | 1  | 1  | 1  | 1 | 0 | 0 | 0 | 0 |
| - ·  | 31 | 24 | 17 | 10 | 4  | 1  | 0 | 0 | 0 | 0 | 0 |

**ALP**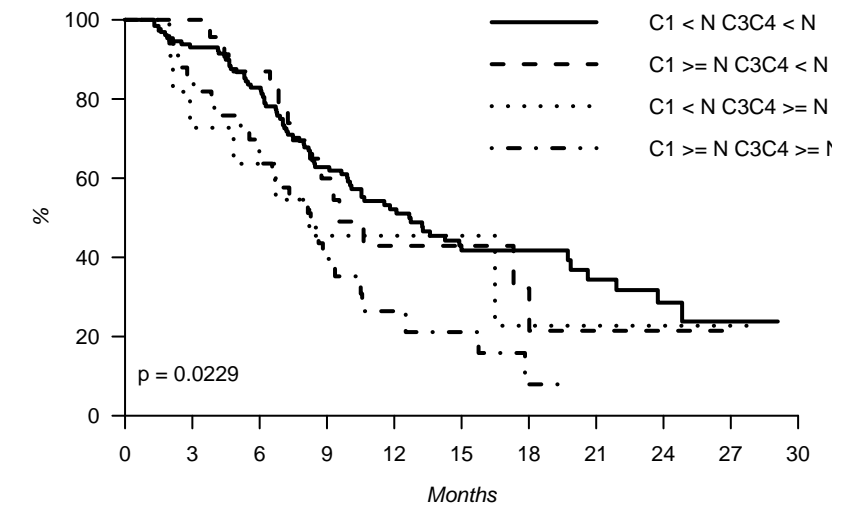**Number at risk**

|      |     |     |     |    |    |    |    |    |   |   |   |
|------|-----|-----|-----|----|----|----|----|----|---|---|---|
| —    | 130 | 120 | 105 | 71 | 48 | 33 | 23 | 13 | 9 | 3 | 0 |
| - ·  | 23  | 23  | 20  | 12 | 6  | 5  | 3  | 2  | 2 | 0 | 0 |
| ···· | 11  | 8   | 7   | 5  | 3  | 2  | 1  | 1  | 1 | 1 | 0 |
| - ·  | 34  | 28  | 22  | 10 | 6  | 4  | 1  | 0  | 0 | 0 | 0 |
